# Supplementary material for: Insight into inhibition of the human amyloid beta protein precursor (APP: PDB ID 3UMI) using (E)-N-(pyridin-2-ylmethylene)arylamine (LR) models: structure elucidation of a family of ZnX2-LRcomplexes
Source: Royal Society of Chemistry journal article supplement (doi:10.1039/c4dt03151b), 2014-12-08
Supplement: c4dt03151b1.pdf [file c4dt03151b1.pdf]

Supplementary Material

for

**Insights into inhibition of human amyloid beta protein precursor (APP: PDB ID 3UMI) by (*E*)-*N*-(pyridin-2-ylmethylene)arylamine ( $L_R$ ) models: Structure elucidation of a family of  $ZnX_2-L_R$  complexes†**

**Tushar S. Basu Baul<sup>a</sup>, Sajal Kundu<sup>a</sup>, Palwinder Singh<sup>b</sup>, Shaveta<sup>b</sup>, and M. Fátima C. Guedes da Silva<sup>c,d</sup>**

Table S1. Docking score (Kcal/mol) of the  $L_R$  during their docking in the peptide<sup>a</sup>

| S. No. | No. of iterations | Docking score (Kcal/mol) after each cycle of 10,000 iterations |            |             |            |
|--------|-------------------|----------------------------------------------------------------|------------|-------------|------------|
|        |                   | $L_H$                                                          | $L_{2-Me}$ | $L_{2-OMe}$ | $L_{4-Me}$ |
| 1      | 10000             | -13.326                                                        | -15.221    | -17.406     | -14.213    |
| 2      | 10000             | -14.113                                                        | -15.587    | -17.612     | -14.480    |
| 3      | 10000             | -14.104                                                        | -15.892    | -17.809     | -14.539    |
| 4      | 10000             | -14.118                                                        | -15.890    | -17.800     | -14.530    |
| 5      | 10000             | -14.115                                                        | -15.890    | -17.805     | -14.532    |
| 6      | 10000             | -14.115                                                        | -15.884    | -17.805     | -14.529    |
| 7      | 10000             | -14.110                                                        | -15.889    | -17.805     | -14.530    |
| 8      | 10000             | -14.112                                                        | -15.889    | -17.801     | -14.530    |
| 9      | 10000             | -14.113                                                        | -15.887    | -17.804     | -14.528    |
| 10     | 10000             | -14.112                                                        | -15.889    | -17.804     | -14.530    |

<sup>a</sup>In each case, the docking is repeated 10 times to obtain the maximum possible interactions between the ligand and the peptide.

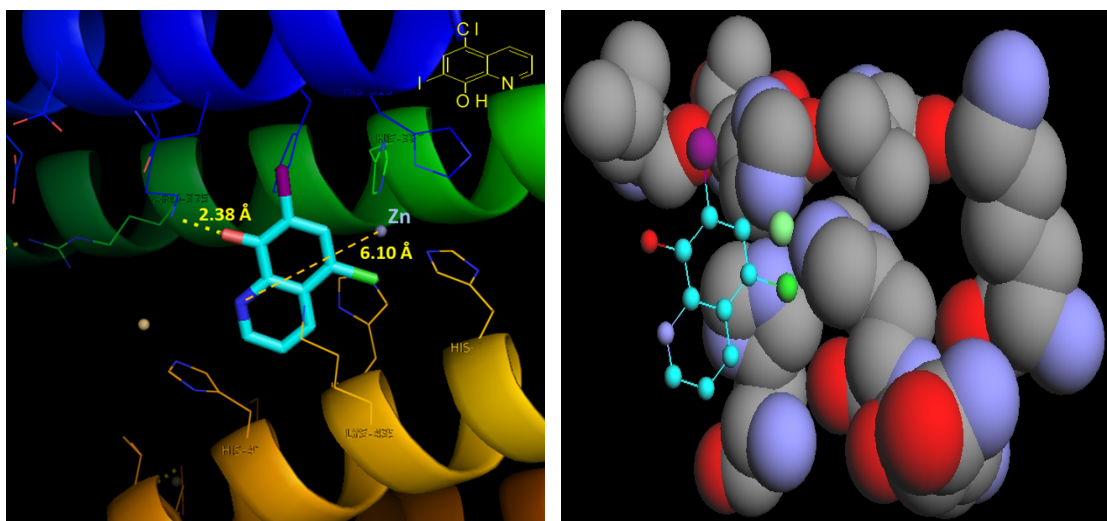

Fig. S1. Clioquinol docked (PyMOL and CPK views) in the amyloid beta protein precursor (APP; PDB ID: 3UMI) showing the ligating sites of the molecule have a remote possibility of interaction with Zn.

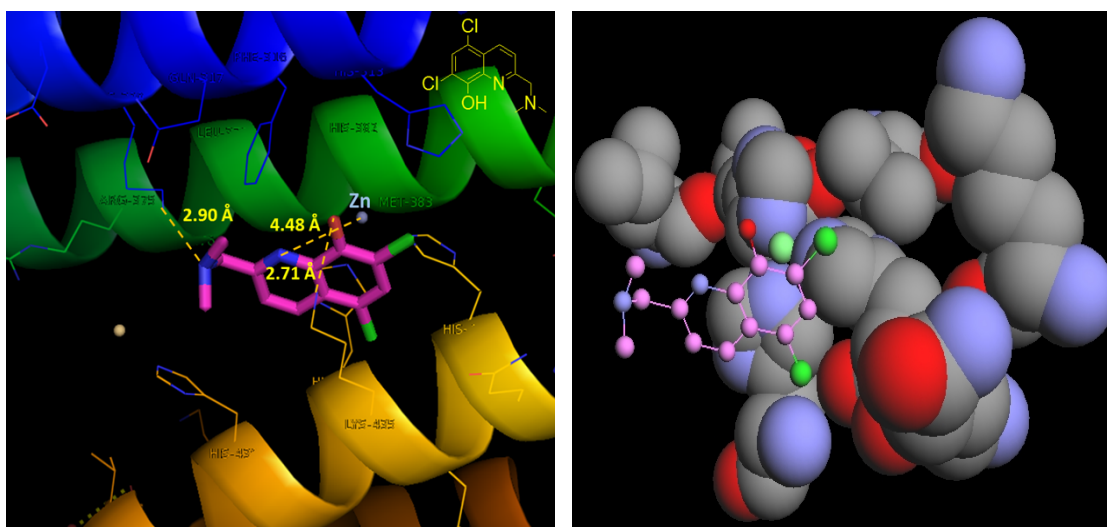

Fig. S2. PBT2 docked (PyMOL and CPK views) in the amyloid beta protein precursor (APP; PDB ID: 3UMI) showing the ligating sites of the molecule have a remote possibility of interaction with Zn.

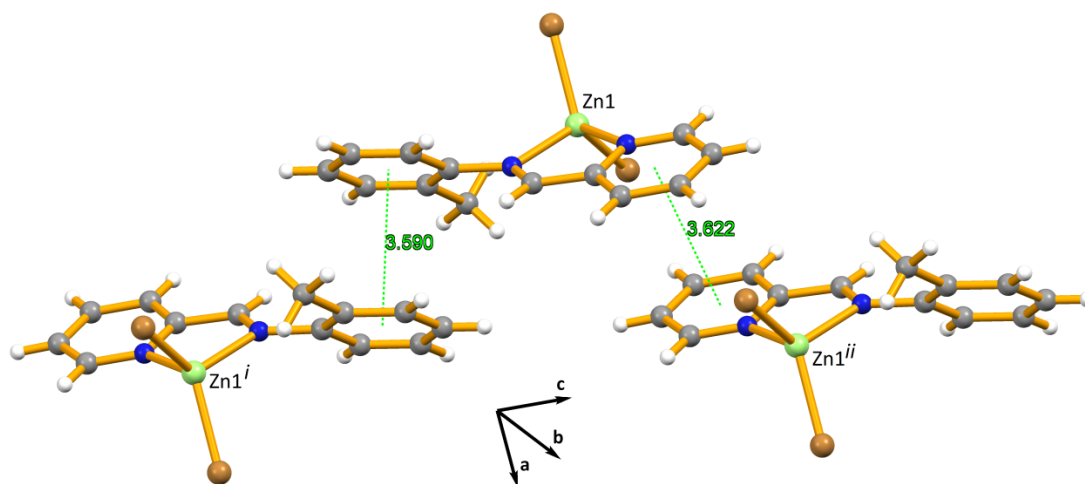

Fig. S3 The  $\pi \cdots \pi$  stacking interactions in compound **1**. Symmetry codes: *i*)  $2-x, -y, -z$ ; *ii*)  $2-x, -y, 1-z$ .

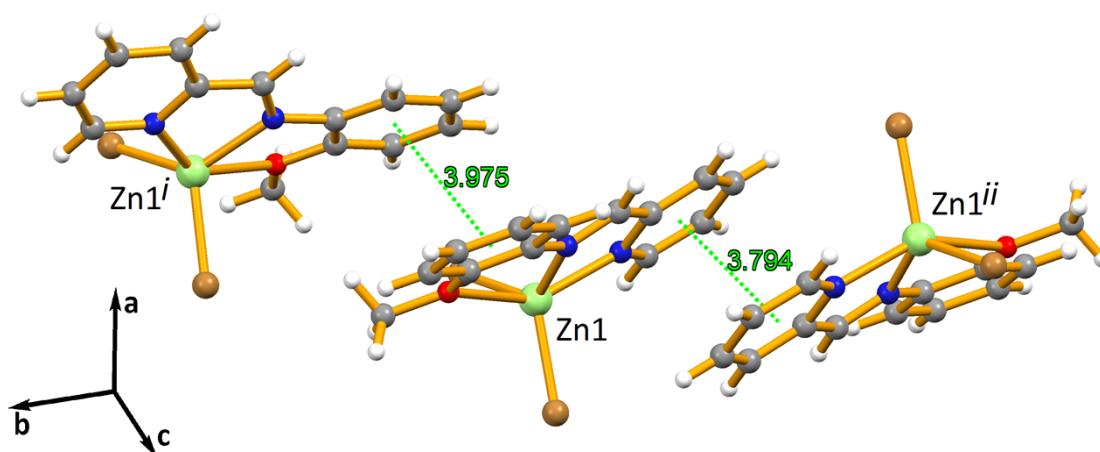

Fig. S4 The  $\pi \cdots \pi$  stacking interactions in compound **2**. Symmetry codes: *i*)  $x, 1/2-y, -1/2+z$ ;  $1-x, -y, 1-z$ .

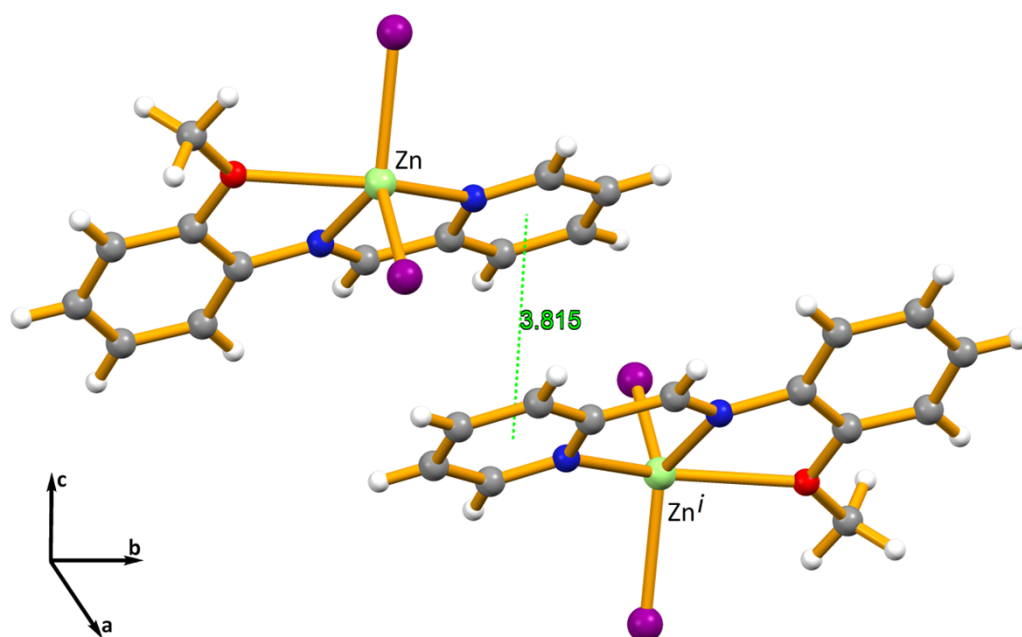

Fig. S5 The  $\pi \cdots \pi$  stacking interaction in compound **3**. Symmetry code: *i*)  $-x, 1-y, 1-z$ .

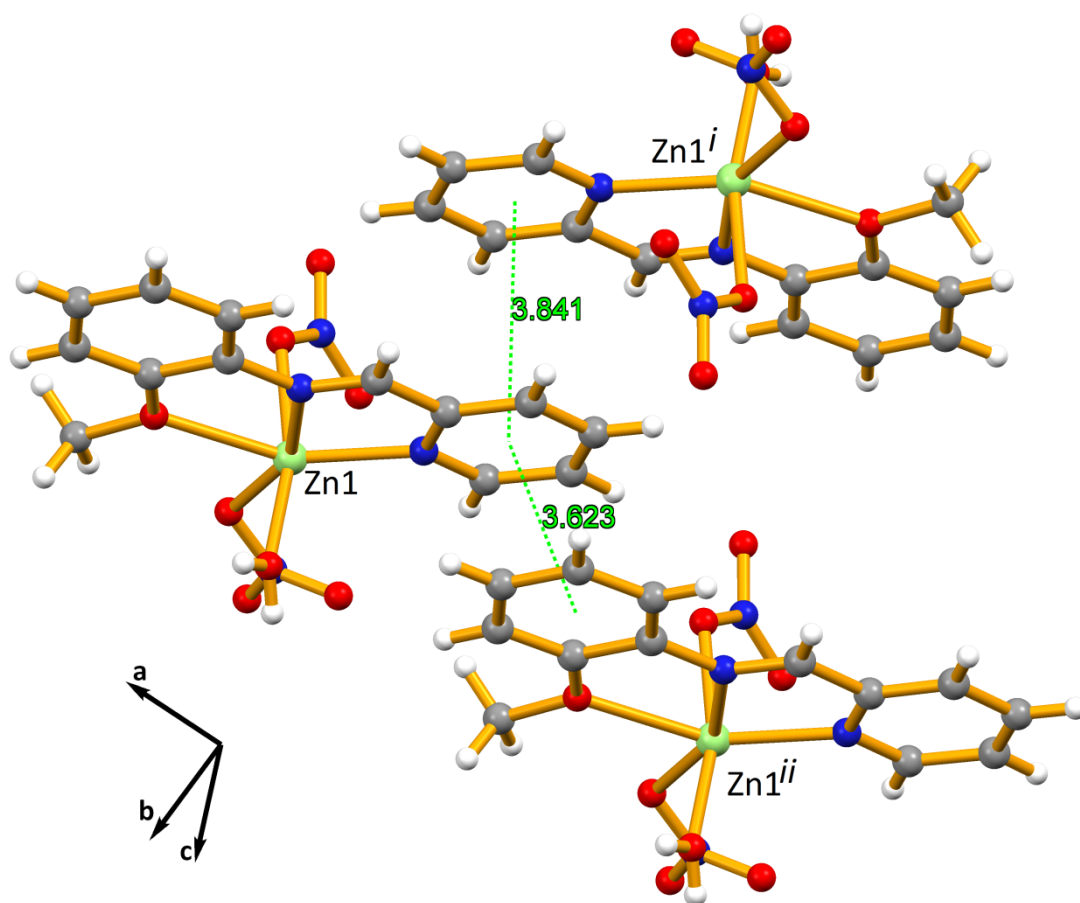

Fig. S6 The  $\pi \cdots \pi$  stacking interactions in compound **4**. Symmetry codes: *i*)  $1-x, 1-y, -z$ ; *ii*)  $-1+x, y, z$ .
